# Supplementary material
Source: Springer Nature journal article supplement (https://www.springermedizin.de/resource/supplementary/12881_2009_493_MOESM1_ESM.pdf/9450772)

**A**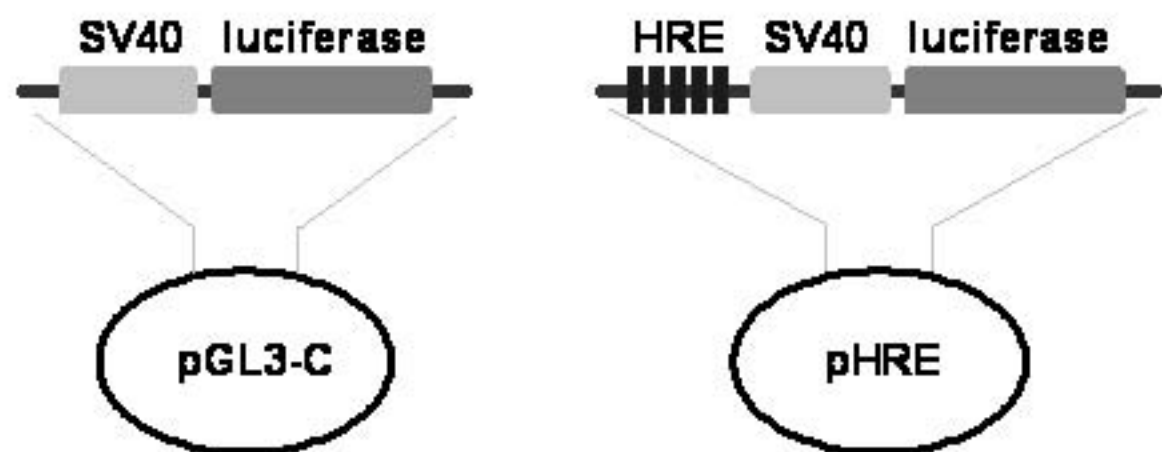**B**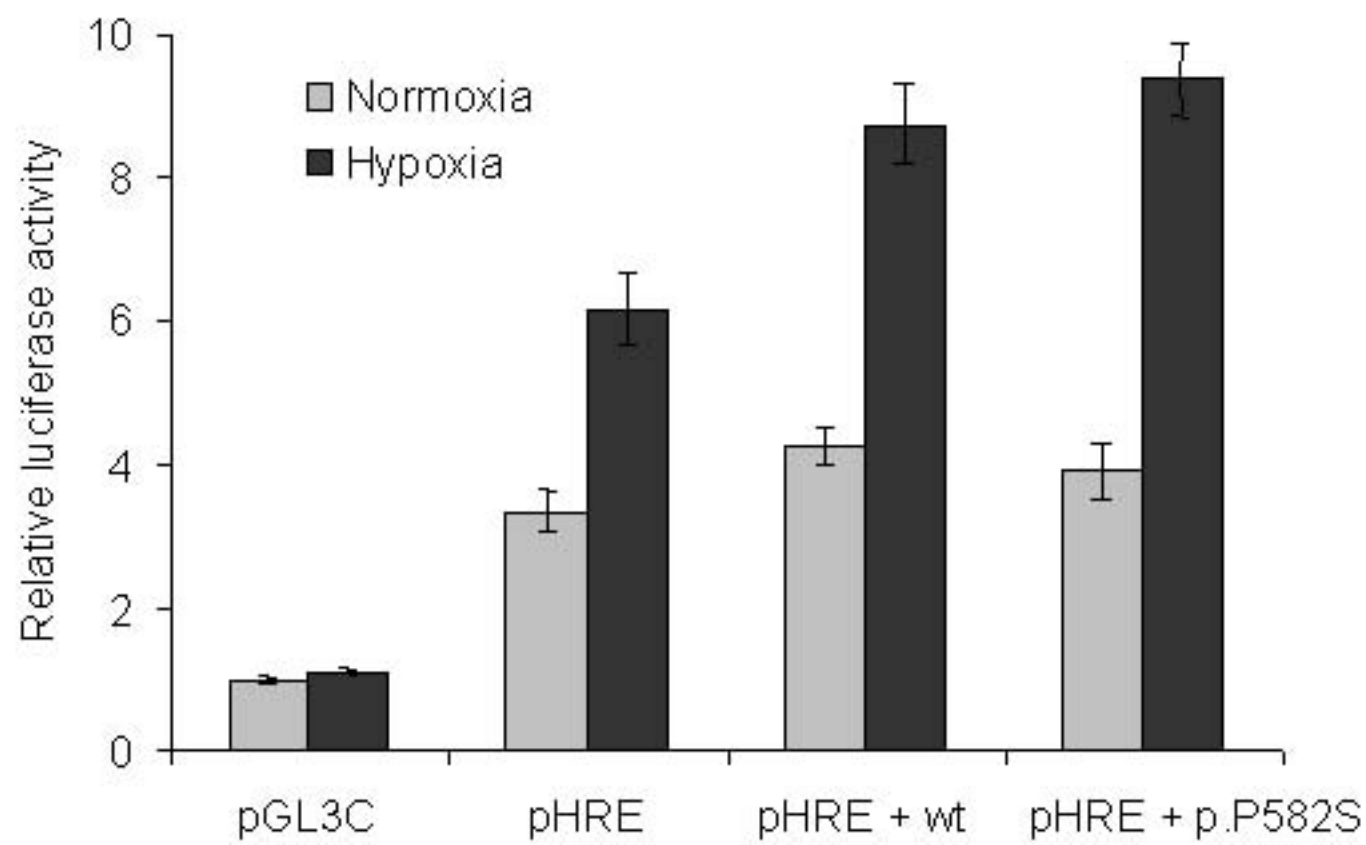

Supplement: MOESM1 [file 9450772]
